# Supplementary material
Source: publisher figshare collection journal article supplement (https://karger.figshare.com/ndownloader/files/28842654)
Supplement: Supplementary file 1 [file 28842654]

**Supplemental Table 2.** Univariate and Multivariate Analysis of Acute Kidney Injury Risk Scores as Overall Mortality Predictors

| **Overall mortality** | **Univariate analysis** | | **Multivariate analysis** | |
| --- | --- | --- | --- | --- |
| **HR** | **P** | **HR** | **P** |
| Contrast material limit score | 1.072 (1.037-1.108) | **<0.001** | 0.814 (0.617-1.074) | 0.145 |
| Volume-to-Creatinine Clearance Ratio | 1.060 (1.035-1.086) | **<0.001** | 1.223 (0.989-1.511) | 0.063 |
| ACEF | 1.016 (0.780-1.323) | 0.907 | **-** | **-** |
| CR4EATME3AD3 | 1.041 (0.987-1.099) | 0.140 | **-** | **-** |
| Mehran model A | 1.067 (1.021-1.116) | **0.004** | 1.002 (0.900-1.116) | 0.967 |
| Mehran model B | 1.077 (1.032-1.123) | **0.001** | 1.032 (0.929-1.148) | 0.554 |
